# Supplementary material for: LRP1 is a master regulator of tau uptake and spread
Source: Springer Nature journal article supplement (doi:10.1038/s41586-020-2156-5), 2020-04-01
Supplement: MOESM4 [file 41586_2020_2156_MOESM4_ESM.xlsx]

## Sheet: Figure 1B
WT	WT	WT	WT	WT	WT	WT	WT	WT	WT	WT	WT
98.1132	107.17	94.717	103.385	95.9635	100.651	105.335	99.7828	94.8835	100.645	95.282	92.5383
NT sgRNA	NT sgRNA	NT sgRNA	NT sgRNA	NT sgRNA	NT sgRNA	NT sgRNA	NT sgRNA	NT sgRNA	NT sgRNA	NT sgRNA	NT sgRNA
99.6471	90.2935	98.1505	106.317	102.564	93.4499	100.512	89.3309	84.9215	108.626	105.883	102.765
LRP1 sgRNA	LRP1 sgRNA	LRP1 sgRNA	LRP1 sgRNA	LRP1 sgRNA	LRP1 sgRNA	LRP1 sgRNA	LRP1 sgRNA	LRP1 sgRNA	LRP1 sgRNA	LRP1 sgRNA	LRP1 sgRNA
3.39623	5.28302	3.39623	4.55729	3.51562	9.63542	5.55256	3.26621	3.59283	5.73688	4.36501	4.73916
LRP1B sgRNA	LRP1B sgRNA	LRP1B sgRNA	LRP1B sgRNA	LRP1B sgRNA	LRP1B sgRNA	LRP1B sgRNA	LRP1B sgRNA	LRP1B sgRNA	LRP1B sgRNA	LRP1B sgRNA	LRP1B sgRNA
109.835	73.0257	57.0215	117.113	125.567	72.9897	93.3566	92.1329	72.3776	102.857	111.667	115.952
LRP2 sgRNA	LRP2 sgRNA	LRP2 sgRNA	LRP2 sgRNA	LRP2 sgRNA	LRP2 sgRNA	LRP2 sgRNA	LRP2 sgRNA	LRP2 sgRNA	LRP2 sgRNA	LRP2 sgRNA	LRP2 sgRNA
66.1025	87.4242	81.3216	155.464	142.68	112.371	130.42	129.545	138.636	96.7164	102.388	104.179
LRP5 sgRNA	LRP5 sgRNA	LRP5 sgRNA	LRP5 sgRNA	LRP5 sgRNA	LRP5 sgRNA	LRP5 sgRNA	LRP5 sgRNA	LRP5 sgRNA
97.7358	127.547	121.132	92.1875	97.526	100.912	83.4517	85.5748	105.825
LRP8 sgRNA	LRP8 sgRNA	LRP8 sgRNA	LRP8 sgRNA	LRP8 sgRNA	LRP8 sgRNA	LRP8 sgRNA	LRP8 sgRNA	LRP8 sgRNA	LRP8 sgRNA	LRP8 sgRNA	LRP8 sgRNA
114.401	81.3953	57.8215	118.351	134.639	101.856	132.867	130.245	137.587	95.8209	85.2239	82.9851
LDLR sgRNA	LDLR sgRNA	LDLR sgRNA	LDLR sgRNA	LDLR sgRNA	LDLR sgRNA	LDLR sgRNA	LDLR sgRNA	LDLR sgRNA
117.736	99.2453	126.415	108.463	108.333	104.818	83.4517	80.9529	88.4652
VLDLR sgRNA	VLDLR sgRNA	VLDLR sgRNA	VLDLR sgRNA	VLDLR sgRNA	VLDLR sgRNA	VLDLR sgRNA	VLDLR sgRNA	VLDLR sgRNA	VLDLR sgRNA	VLDLR sgRNA	VLDLR sgRNA
86.6986	75.4549	107.687	111.546	124.536	134.845	136.014	132.867	139.86	90.1493	75.2239	71.6418

## Sheet: Figure 1C
	WT	WT	WT	WT	WT	WT	WT	WT	WT	WT	WT	NT sgRNA	NT sgRNA	NT sgRNA	NT sgRNA	NT sgRNA	NT sgRNA	NT sgRNA	NT sgRNA	NT sgRNA	NT sgRNA	NT sgRNA	LRP1 sgRNA	LRP1 sgRNA	LRP1 sgRNA	LRP1 sgRNA	LRP1 sgRNA	LRP1 sgRNA	LRP1 sgRNA	LRP1 sgRNA	LRP1 sgRNA	LRP1 sgRNA	LRP1 sgRNA
Oligomers	88	96.3077	109.538	117.077	105.833	112.639	86.3889	93.8889	100.964	101.084	101.084	88.7692	87.0833	112.769	115.692	108.75	111.389	87.0833	101.084	100.361	99.2771	94.8835	1.84615	2.92308	10.7692	12.9231	8.61111	9.58333	16.6667	18.6111	7.46988	4.93976	6.14458
Sonicated Fibrils	84.1791	95.6716	117.91	102.09	103.5	73.5	112.5	112.75	95.1111	103.556	108.889	103.284	106.567	93.1343	101.791	85.75	89	82.75	112.5	88.8889	61.5556	72.4444	26.7164	38.9552	39.403	51.9403	58	48	47.75	45	63.5556	66.6667	70

## Sheet: Figure 1D
WT	WT	WT	WT	WT	WT	WT	WT	WT	NT sgRNA	NT sgRNA	NT sgRNA	NT sgRNA	NT sgRNA	NT sgRNA	NT sgRNA	NT sgRNA	NT sgRNA	LRP1 sgRNA	LRP1 sgRNA	LRP1 sgRNA	LRP1 sgRNA	LRP1 sgRNA	LRP1 sgRNA	LRP1 sgRNA	LRP1 sgRNA	LRP1 sgRNA
87.0637	119.918	142.094	120.165	104.894	103.047	96.0295	96.0295	87.2428	121.29	98.0645	140.645	89.7119	94.2214	100.573	95.4566	109.749	77.3663	117.811	97.1193	101.288	74.6781	114.781	101.404	90.0083	93.8068	71.6049

## Sheet: Figure 1E
	WT	WT	WT	WT	WT	WT	WT	WT	WT	NT sgRNA	NT sgRNA	NT sgRNA	NT sgRNA	NT sgRNA	NT sgRNA	NT sgRNA	NT sgRNA	NT sgRNA	LRP1 sgRNA	LRP1 sgRNA	LRP1 sgRNA	LRP1 sgRNA	LRP1 sgRNA	LRP1 sgRNA	LRP1 sgRNA	LRP1 sgRNA	LRP1 sgRNA
0N3R	104.762	96.8254	89.4362	130.564	113.03	86.9697				104.762	92.0635	108.605	96.6766	107.333	98.6667				1.5873	7.93651	2.96736	2.67062	4.30108	3.11828
0N4R	92.52	98.7654	88.6059	111.394	100.115	103.103				88.8235	93.7182	105.362	97.2922	105.867	96.9333				0.726216	0.580973	16.2198	6.03217	7.74194	7.63441
1N3R	102.703	96.4516	109.931	89.931	102.258	100.215				117.838	79.1892	98.7586	84.2759	101.505	99.7849				0.540541	1.62162	16.6897	26.2069	8.60215	5.69892
1N4R	96.5854	104.024	100.435	100.326	99.6774	99.7849				98.2927	86.2195	95.8696	80.2174	100.43	102.151				0.243902	0.609756	13.3696	11.413	15.8065	5.26882
2N3R	89.5652	111.739	94.7826	99.6739	105.161	97.957				90	85.4348	76.8478	98.4783	95.2688	88.6022				2.6087	0	14.3478	5.65217	11.3978	6.66667
K18	98.6	98.4	98.2	97.6	97.8	98.1	98	96.3	83.2	95.6	94.9	95.1	93.5	92.2	93.5	98.4	94.3	80.7	7	4.6	4.9	4.4	4.3	3.8	12.3	8.1	3.4
K19	103.068	97.1591	102.903	99.7849	99.7849	95.0538				85.1136	90	81.25	141	92.5	104.5				12.0455	12.6136	0.808081	1.31313	10.9091	12.4242
