# Supplementary material for: LRP1 is a master regulator of tau uptake and spread
Source: Springer Nature journal article supplement (doi:10.1038/s41586-020-2156-5), 2020-04-01
Supplement: MOESM6 [file 41586_2020_2156_MOESM6_ESM.xlsx]

## Sheet: Figure 3B
	WT	WT	WT	WT	WT	WT	WT	WT	WT	WT	NT sgRNA	NT sgRNA	NT sgRNA	NT sgRNA	NT sgRNA	NT sgRNA	NT sgRNA	NT sgRNA	NT sgRNA	NT sgRNA	LRP1 sgRNA	LRP1 sgRNA	LRP1 sgRNA	LRP1 sgRNA	LRP1 sgRNA	LRP1 sgRNA	LRP1 sgRNA	LRP1 sgRNA	LRP1 sgRNA	LRP1 sgRNA
Monomer	107.335	92.665	104.38	95.6204	82.6235	107.496	109.881	100.637	98.9384	100.425	107.824	100.244	109.854	109.002	127.768	145.656	104.259	106.985	111.414	118.399	32.2738	50.1222	17.7616	18.8564	4.59966	7.6661	2.38501	5.9448	2.65393	3.60934
	WT	WT	WT	WT	WT	WT	WT	WT	WT	WT	NT sgRNA	NT sgRNA	NT sgRNA	NT sgRNA	NT sgRNA	NT sgRNA	NT sgRNA	NT sgRNA	NT sgRNA	NT sgRNA	LRP1 sgRNA	LRP1 sgRNA	LRP1 sgRNA	LRP1 sgRNA	LRP1 sgRNA	LRP1 sgRNA	LRP1 sgRNA	LRP1 sgRNA	LRP1 sgRNA	LRP1 sgRNA
Oligomer	80.5085	109.322	101.816	108.232	117.502	103.752	99.5459	95.7502	73.251	101.223	94.5466	97.0184	101.035	107.369	104.751	104.75	110.251	97.8451	118.25	92.5022	4.59966	1.36286	2.72572	3.91823	2.90126	3.33655	21.7962	19.7025	28.6365	18.6266

## Sheet: Figure 3C
Tau (WT)	Tau (WT)	Tau (WT)	Tau (WT)	Tau (WT)	Tau (WT)	Tau (WT)	Tau (LRP1 sgRNA)	Tau (LRP1 sgRNA)	Tau (LRP1 sgRNA)	Tau (LRP1 sgRNA)	Tau (LRP1 sgRNA)	Tau (LRP1 sgRNA)	Tau (LRP1 sgRNA)	Tau (WT + RAP)	Tau (WT + RAP)	Tau (WT + RAP)	Tau (WT + RAP)	Tau (WT + RAP)	Tau (WT + RAP)	Tau (WT + RAP)	Tau (WT + mtRAP)	Tau (WT + mtRAP)	Tau (WT + mtRAP)	Tau (WT + mtRAP)	Tau (WT + mtRAP)	Tau (WT + mtRAP)	Tau (WT + mtRAP)
117.5	103.75	99.5	104.38	95.6204	101.34	98.6605	5.9448	2.65393	3.60934	17.7616	18.8564	8.0292	3.89294	58.5987	66.3482	56.3694	47.4453	62.7737	53.8929	17.5182	101.699	98.5138	86.9427	120.56	119.465	101.223	97.8451
Tfn (WT)	Tfn (WT)	Tfn (WT)	Tfn (WT)	Tfn (WT)	Tfn (WT)	Tfn (WT)	Tfn (LRP1 sgRNA)	Tfn (LRP1 sgRNA)	Tfn (LRP1 sgRNA)	Tfn (LRP1 sgRNA)	Tfn (LRP1 sgRNA)	Tfn (LRP1 sgRNA)	Tfn (LRP1 sgRNA)	Tfn (WT + RAP)	Tfn (WT + RAP)	Tfn (WT + RAP)	Tfn (WT + RAP)	Tfn (WT + RAP)	Tfn (WT + RAP)	Tfn (WT + RAP)	Tfn (WT + mtRAP)	Tfn (WT + mtRAP)	Tfn (WT + mtRAP)	Tfn (WT + mtRAP)	Tfn (WT + mtRAP)	Tfn (WT + mtRAP)	Tfn (WT + mtRAP)
143.38	83.0281	75.7021	116.23	83.7696	105.303	94.6974	67.8528	96.9824	71.8646	120.419	140.314	103.556	91.5783	103.611	85.4701	69.2482	72.2513	104.712	105.677	87.9601	104.832	78.8418	73.6089	109.854	109.002	104.605	95.3947
