# Supplementary material for: LRP1 is a master regulator of tau uptake and spread
Source: Springer Nature journal article supplement (doi:10.1038/s41586-020-2156-5), 2020-04-01
Supplement: MOESM9 [file 41586_2020_2156_MOESM9_ESM.xlsx]

## Sheet: Extended Data Fig 2A
RAP (nM)	WT RAP comp		Lysine Capped
0.1	95.451	104.549	104.761	95.2391
12.5	65.2589	70.0887	116.338	79.3205
25	55.9587	44.704	91.7995	100.797
50	42.9743	19.9259	92.6804	101.195
100	6.91902	1.9544	79.0688	113.884
200	4.67258	1.90947	101.951	95.4279

## Sheet: Extended Data Fig 2B
RAP (log nM)	RAP		RAP KK256,270AA ("mtRAP")
-2	106.225	93.7748	101.571	98.4286
-0.30103	83.8411	86.8874	90.7143	94
0	77.4834	67.5497	71.4286	87.7143
0.30103	48.3444	52.4503	81.1429	69
0.60206	28.7417	25.0331	74.7143	70.5714
0.90309	11.9205	13.9073	65.7143	91.4286

## Sheet: Extended Data Fig 2C
mLRP1	mLRP1	mLRP1	mLRP1	mLRP1	mLRP1	mLRP1	mLRP1	mLRP1	mLRP1	mLRP1	mLRP1	mLRP1	mLRP1	mLRP1	mLRP1	mLRP1	mLRP1	mLRP1	mLRP1	mLRP1	mLRP1	mLRP1	mLRP1	mLRP1	mLRP1	mLRP1	mLRP1	mLRP1	mLRP1	mLRP1	mLRP1	mLRP1	mLRP1	mLRP1	mLRP1	mLRP1	mLRP1	mLRP1	mLRP1	mLRP1	mLRP1	mLRP1	mLRP1	mLRP1	mLRP1	mLRP1	mLRP1	mLRP1	mLRP1
42616.1	23417.3	34180.8	41710.5	20262.4	7689.75	49049.5	42617.3	27964.3	42549.2	41874.9	49738.4	29133	71234.9	44627.6	7720.47	9107.1	10220.2	44975.2	23448	31973.9	34903.1	46552.6	37794.1	57013	35287.5	54343.5	27770.2	8497.87	21735.6	14083.4	17343.6	39048.9	60477.9	22613	28157.5	16063.6	7472.23	16798.7	22854.8	36827.7	27782.3	23795.3	18295.3	14625.4	53730.6	51658.7	31209	21328.8	15274.4
[truncated: 190 more columns]

## Sheet: Extended Data Fig 2E
Protein (nM)	Transferrin-488		BSA-488		GFP		2N4R-488		N-term Tau-488
1	2.2	1.4	0.2	0.1	0.7	0.6	0.3	1.6	0.7	0.9
16.125							4.1	2.1
31.25			2.2	3.1	0.6	0.6	28.2	12.6
62.5	9.2	8.1	4.2	3.1	0.6	0.6	70.5	56.4	0.7	1.1
125	37.4	11	2.2	0.8	0.6	0.9	86.5	85.8	0.2	3.5
250	60.1	36.1	2.1	3.1	0.5	0.6	92.6	98	9	9.5
500	84.4	75.3	4.2	3.1	0.8	0.8			48.2	44.9
1000	98.6	96.5	6.7	8.9	2.4	3.9			93.8	91.1

## Sheet: Extended Data Fig 2G
	CM	CM	CM	CM	CM	CM	CM	CM	CM	ApoE2 CM	ApoE2 CM	ApoE2 CM	ApoE2 CM	ApoE2 CM	ApoE2 CM	ApoE2 CM	ApoE2 CM	ApoE2 CM	ApoE3 CM	ApoE3 CM	ApoE3 CM	ApoE3 CM	ApoE3 CM	ApoE3 CM	ApoE3 CM	ApoE3 CM	ApoE3 CM	ApoE4 CM	ApoE4 CM	ApoE4 CM	ApoE4 CM	ApoE4 CM	ApoE4 CM	ApoE4 CM	ApoE4 CM	ApoE4 CM
2N4R	102.364	97.6359	93.9683	102.222	103.81	98.2188	101.781	99.7644	97.7621	67.3077	81.5385	84.359	70.9524	57.9365	50.4762	73.5369	77.6081	83.3333	58.5106	60.1655	71.0402	74.7619	75.3968	62.2222	50.7634	58.0153	67.5573	70.4492	65.3664	73.1678	79.2308	74.4615	59.6923	47.4555	77.7354	72.6463
Tfn	100.127	99.493	100.634	102.381	100.238	96.9048	101.385	91.0769	100.462	94.8035	92.2687	99.1128	107.024	101.667	98.8095	102.356	102.154	99.0769	91.0013	95.1838	98.4791	103.214	101.667	108.571	108.077	97.5641	92.8205	101.774	101.014	100	111.905	109.048	105.714	100.118	92.5795	91.8728
